# Supplementary material for: Albedo-Induced Global Warming Impact at Multiple Temporal Scales within an Upper Midwest USA Watershed
Source: MDPI journal article supplement (doi:10.3390/land11020283), 2022-02-13
Supplement: s1 [file s1]

# Albedo-Induced Global Warming Impact at Multiple Temporal Scales within an Upper Midwest USA Watershed

Pietro Sciusco <sup>1,2,\*</sup>, Jiquan Chen <sup>1,2,3</sup>, Vincenzo Giannico <sup>4</sup>, Michael Abraha <sup>2,3</sup>, Cheyenne Lei <sup>1,2,3</sup>, Gabriela Shirkey <sup>1,2</sup>, Jing Yuan <sup>2</sup> and G. Philip Robertson <sup>3,5,6</sup>

- <sup>1</sup> Department of Geography, Environment & Spatial Sciences, Michigan State University, East Lansing, MI 48824, USA; jqchen@msu.edu (J.C.); cheyenne@msu.edu (C.L.); shirkeyg@msu.edu (G.S.)
  - <sup>2</sup> Center for Global Change and Earth Observations, Michigan State University, East Lansing, MI 48823, USA; abraha@msu.edu (M.A.); yuanji11@msu.edu (J.Y.)
  - <sup>3</sup> Great Lakes Bioenergy Research Center, Michigan State University, East Lansing, MI 48824, USA; robert30@msu.edu
  - <sup>4</sup> Department of Agricultural and Environmental Sciences, University of Bari A. Moro, 70126 Bari, Italy; vincenzo.giannico@uniba.it
  - <sup>5</sup> W.K. Kellogg Biological Station, Michigan State University, Hickory Corners, MI 49060, USA
  - <sup>6</sup> Department of Plant, Soil, and Microbial Sciences, Michigan State University, East Lansing, MI 48824, USA
- \* Correspondence: sciuscop@msu.edu; Tel.: +1-(517)-505-1074 or +39-(366)-3820032

This file contains the following tables and figure:

**Tables:** S1, S2, S3.1–S3.5, S4.1–S4.5, S5, S6, S7, S8.1–S8.5, and S9.1–S9.5

**Figure:** S1

**Table S1.** Summary table for the overall linear downscaling models (Equation (1) in the main text) for the estimated  $\hat{\alpha}_{gs}$  and  $\hat{\alpha}_{mo}$  (dependent variables) across the entire Kalamazoo River Watershed.

|               | Variable  | Estimates | SE    | t         | p   | DF | adj. R <sup>2</sup> |
|---------------|-----------|-----------|-------|-----------|-----|----|---------------------|
| $\alpha_{gs}$ | barren    | 0.152     | 0.000 | 1340.300  | *** |    |                     |
|               | *cropland | 0.174     | 0.000 | 26281.727 | *** |    |                     |
|               | *forest   | 0.145     | 0.000 | 13171.109 | *** |    |                     |
|               | grassland | 0.129     | 0.000 | 1347.355  | *** |    |                     |
|               | *pasture  | 0.165     | 0.000 | 5715.941  | *** | 9  | 0.995               |
|               | shrubland | 0.138     | 0.000 | 653.438   | *** |    |                     |
|               | *urban    | 0.145     | 0.000 | 10926.929 | *** |    |                     |
|               | water     | 0.091     | 0.000 | 2815.767  | *** |    |                     |
|               | wetland   | 0.154     | 0.000 | 12248.465 | *** |    |                     |
| $\alpha_{mo}$ | barren    | 0.237     | 0.003 | 93.220    | *** |    |                     |
|               | *cropland | 0.283     | 0.000 | 1904.740  | *** |    |                     |
|               | *forest   | 0.185     | 0.000 | 745.962   | *** |    |                     |
|               | grassland | 0.171     | 0.002 | 76.378    | *** |    |                     |
|               | *pasture  | 0.260     | 0.001 | 398.528   | *** | 9  | 0.745               |
|               | shrubland | 0.149     | 0.005 | 32.996    | *** |    |                     |
|               | *urban    | 0.215     | 0.000 | 715.211   | *** |    |                     |
|               | water     | 0.183     | 0.001 | 251.948   | *** |    |                     |
|               | wetland   | 0.215     | 0.000 | 766.229   | *** |    |                     |

Signif. codes: \*\*\* p-value < 0.001, \*\* p-value < 0.01, \* p-value < 0.05, · p-value < 0.1, " " p-value > 0.1.

$\hat{\alpha}_{gs}$  and  $\hat{\alpha}_{mo}$ : estimated whites-sky shortwave albedo for growing season and monthly periods, respectively.

"\*": cover types considered in this study.

**Table S2.** Mean ( $\pm$  standard deviation) for  $\hat{\alpha}_{gs}$  and  $\hat{\alpha}_{mo}$  2001–2019 for the four cover types. Average values ( $\bar{X}$ ) across the four cover types ( $\bar{X}_{cover\ type}$ ) and for the 19-years growing season ( $\bar{X}_{gs}$ ) and the 11-month ( $\bar{X}_{mo}$ ) periods are also shown.

| Time-period         |                | Cover type    |               |               |               |                         |
|---------------------|----------------|---------------|---------------|---------------|---------------|-------------------------|
|                     |                | Cropland      | Forest        | Pasture       | Urban         | $\bar{X}_{cover\ type}$ |
| $\hat{\alpha}_{gs}$ | 2001           | 0.171(±0.002) | 0.143(±0.001) | 0.163(±0.001) | 0.145(±0.001) | 0.156(±0.013)           |
|                     | 2002           | 0.174(±0.001) | 0.152(±0.001) | 0.166(±0.001) | 0.149(±0.002) | 0.160(±0.011)           |
|                     | 2003           | 0.169(±0.001) | 0.146(±0.001) | 0.162(±0.001) | 0.145(±0.001) | 0.155(±0.012)           |
|                     | 2004           | 0.172(±0.002) | 0.144(±0.001) | 0.161(±0.001) | 0.143(±0.002) | 0.155(±0.014)           |
|                     | 2005           | 0.171(±0.002) | 0.145(±0.001) | 0.162(±0.001) | 0.144(±0.002) | 0.156(±0.013)           |
|                     | 2006           | 0.172(±0.002) | 0.146(±0.001) | 0.165(±0.001) | 0.145(±0.002) | 0.157(±0.014)           |
|                     | 2007           | 0.170(±0.001) | 0.148(±0.001) | 0.160(±0.001) | 0.146(±0.001) | 0.156(±0.011)           |
|                     | 2008           | 0.171(±0.001) | 0.147(±0.001) | 0.163(±0.001) | 0.146(±0.001) | 0.157(±0.012)           |
|                     | 2009           | 0.174(±0.002) | 0.146(±0.002) | 0.166(±0.001) | 0.148(±0.002) | 0.158(±0.014)           |
|                     | 2010           | 0.172(±0.002) | 0.141(±0.002) | 0.161(±0.001) | 0.145(±0.002) | 0.155(±0.014)           |
|                     | 2011           | 0.175(±0.002) | 0.149(±0.001) | 0.166(±0.001) | 0.147(±0.002) | 0.159(±0.013)           |
|                     | 2012           | 0.170(±0.001) | 0.150(±0.001) | 0.161(±0.001) | 0.147(±0.001) | 0.157(±0.010)           |
|                     | 2013           | 0.168(±0.001) | 0.145(±0.001) | 0.160(±0.001) | 0.144(±0.001) | 0.154(±0.012)           |
|                     | 2014           | 0.172(±0.002) | 0.147(±0.001) | 0.167(±0.001) | 0.147(±0.002) | 0.158(±0.013)           |
|                     | 2015           | 0.169(±0.002) | 0.134(±0.002) | 0.156(±0.001) | 0.142(±0.002) | 0.150(±0.015)           |
|                     | 2016           | 0.171(±0.001) | 0.147(±0.001) | 0.163(±0.001) | 0.147(±0.002) | 0.157(±0.012)           |
|                     | 2017           | 0.170(±0.002) | 0.141(±0.001) | 0.159(±0.001) | 0.142(±0.002) | 0.153(±0.014)           |
|                     | 2018           | 0.168(±0.002) | 0.141(±0.001) | 0.156(±0.001) | 0.143(±0.001) | 0.152(±0.013)           |
|                     | 2019           | 0.173(±0.001) | 0.151(±0.001) | 0.164(±0.001) | 0.148(±0.001) | 0.159(±0.012)           |
|                     | $\bar{X}_{gs}$ | 0.171(±0.002) | 0.145(±0.004) | 0.162(±0.003) | 0.146(±0.002) | 0.156(±0.013)           |
| $\hat{\alpha}_{mo}$ | Jan            | 0.575(±0.013) | 0.320(±0.012) | 0.504(±0.013) | 0.413(±0.008) | 0.453(±0.111)           |
|                     | Feb            | 0.579(±0.013) | 0.333(±0.012) | 0.516(±0.013) | 0.408(±0.008) | 0.459(±0.109)           |
|                     | Apr            | 0.162(±0.002) | 0.129(±0.002) | 0.155(±0.002) | 0.139(±0.002) | 0.147(±0.015)           |
|                     | May            | 0.175(±0.002) | 0.146(±0.002) | 0.169(±0.002) | 0.150(±0.001) | 0.160(±0.014)           |
|                     | Jun            | 0.178(±0.001) | 0.163(±0.001) | 0.177(±0.001) | 0.158(±0.001) | 0.169(±0.010)           |
|                     | Jul            | 0.179(±0.001) | 0.160(±0.001) | 0.173(±0.001) | 0.155(±0.001) | 0.167(±0.011)           |
|                     | Aug            | 0.177(±0.002) | 0.153(±0.001) | 0.166(±0.001) | 0.149(±0.002) | 0.161(±0.013)           |
|                     | Sep            | 0.170(±0.002) | 0.145(±0.001) | 0.160(±0.001) | 0.144(±0.001) | 0.155(±0.012)           |
|                     | Oct            | 0.156(±0.001) | 0.136(±0.001) | 0.151(±0.001) | 0.138(±0.001) | 0.145(±0.010)           |
|                     | Nov            | 0.158(±0.002) | 0.119(±0.002) | 0.147(±0.002) | 0.134(±0.002) | 0.140(±0.017)           |
|                     | Dec            | 0.530(±0.013) | 0.277(±0.012) | 0.463(±0.014) | 0.374(±0.008) | 0.411(±0.110)           |
|                     | $\bar{X}_{mo}$ | 0.276(±0.183) | 0.189(±0.080) | 0.253(±0.156) | 0.215(±0.119) | 0.233(±0.134)           |

$\hat{\alpha}_{gs}$  and  $\hat{\alpha}_{mo}$ : estimated whites-sky shortwave albedo for growing season and monthly periods, respectively.

**Table S3.1.** Growing season albedo-induced global warming impact ( $\text{GWI}_{\Delta\alpha_{\text{GS}}}$ ,  $\text{Mg C}_{\text{eq}} \text{ ha}^{-1} \text{ gs}^{-1}$ ) 2001–2019 for Ecoregion 56b. Cumulative  $\text{GWI}_{\Delta\alpha_{\text{GS}}}$  value for the entire ecoregion over the 19-year period is underlined. Major deviations (i.e., peaks ( $\uparrow$ ) and decreases ( $\downarrow$ )) from the  $\text{GWI}_{\Delta\alpha_{\text{GS}}}$  mean are also shown. Positive and negative values of  $\text{GWI}_{\Delta\alpha_{\text{GS}}}$  indicate growing season warming and cooling effects, respectively, equivalent to Carbon ( $\text{C}_{\text{eq}}$ ) emission and mitigation, respectively, 2001–2019.

| Ecoregion | GS                    | $\text{GWI}_{\Delta\alpha_{\text{GS}}} (\text{Mg C}_{\text{eq}} \text{ ha}^{-1} \text{ gs}^{-1})$ |                         |                      |                |
|-----------|-----------------------|---------------------------------------------------------------------------------------------------|-------------------------|----------------------|----------------|
|           |                       | Cropland                                                                                          | Pasture                 | Urban                | Tot.cover type |
| 56b       | 2001                  | -0.37                                                                                             | -0.29 $\downarrow$      | -0.03                | -0.69          |
|           | 2002                  | -0.29 $\uparrow$                                                                                  | -0.20 $\uparrow^{**}$   | 0.04 $\uparrow^{**}$ | -0.45          |
|           | 2003                  | -0.32 $\uparrow^{**}$                                                                             | -0.23                   | 0.01                 | -0.54          |
|           | 2004                  | -0.39                                                                                             | -0.25                   | 0.00                 | -0.64          |
|           | 2005                  | -0.35                                                                                             | -0.24                   | 0.01                 | -0.58          |
|           | 2006                  | -0.36                                                                                             | -0.27 $\downarrow^*$    | 0.01                 | -0.63          |
|           | 2007                  | -0.30 $\uparrow$                                                                                  | -0.18 $\uparrow$        | 0.03 $\uparrow$      | -0.46          |
|           | 2008                  | -0.34                                                                                             | -0.24                   | 0.00                 | -0.58          |
|           | 2009                  | -0.39                                                                                             | -0.28 $\downarrow$      | -0.02                | -0.68          |
|           | 2010                  | -0.42 $\downarrow$                                                                                | -0.29 $\downarrow$      | -0.06                | -0.77          |
|           | 2011                  | -0.35                                                                                             | -0.24                   | 0.02 $\uparrow^*$    | -0.57          |
|           | 2012                  | -0.27 $\uparrow^*$                                                                                | -0.16 $\uparrow^*$      | 0.04 $\uparrow^{**}$ | -0.39          |
|           | 2013                  | -0.33                                                                                             | -0.22                   | 0.01                 | -0.55          |
|           | 2014                  | -0.35                                                                                             | -0.28 $\downarrow$      | 0.00                 | -0.64          |
|           | 2015                  | -0.47 $\downarrow^{**}$                                                                           | -0.31 $\downarrow^{**}$ | -0.10                | -0.89          |
|           | 2016                  | -0.33                                                                                             | -0.23                   | 0.00                 | -0.56          |
|           | 2017                  | -0.40 $\downarrow^*$                                                                              | -0.25                   | -0.01                | -0.67          |
|           | 2018                  | -0.37                                                                                             | -0.22                   | -0.03                | -0.62          |
|           | 2019                  | -0.31 $\uparrow$                                                                                  | -0.20 $\uparrow^{**}$   | 0.03 $\uparrow$      | -0.48          |
|           | Tot.2001–2019         | -6.73                                                                                             | -4.60                   | -0.03                | <u>-11.36</u>  |
|           | $\bar{X}_{2001-2019}$ | -0.35                                                                                             | -0.24                   | 0.00                 |                |

GS: growing season.

"\*" and "\*\*": min and max decrease/peak, respectively.

"-": no data available.

**Table S3.2.** Growing season albedo-induced global warming impact ( $\text{GWI}_{\Delta\alpha_{\text{GS}}}$ ,  $\text{Mg C}_{\text{eq}} \text{ha}^{-1} \text{gs}^{-1}$ ) 2001–2019 for Ecoregion 56d. Cumulative  $\text{GWI}_{\Delta\alpha_{\text{GS}}}$  value for the entire ecoregion over the 19-year period is underlined. Major deviations (i.e., peaks ( $\uparrow$ ) and decreases ( $\downarrow$ )) from the  $\text{GWI}_{\Delta\alpha_{\text{GS}}}$  mean are also shown. Positive and negative values of  $\text{GWI}_{\Delta\alpha_{\text{GS}}}$  indicate growing season warming and cooling effects, respectively, equivalent to Carbon ( $\text{C}_{\text{eq}}$ ) emission and mitigation, respectively, 2001–2019.

| Ecoregion | GS                    | $\text{GWI}_{\Delta\alpha_{\text{GS}}} (\text{Mg C}_{\text{eq}} \text{ha}^{-1} \text{gs}^{-1})$ |         |                         |                |
|-----------|-----------------------|-------------------------------------------------------------------------------------------------|---------|-------------------------|----------------|
|           |                       | Cropland                                                                                        | Pasture | Urban                   | Tot.cover type |
| 56d       | 2001                  | -0.37                                                                                           | –       | -0.04 $\downarrow^*$    | -0.41          |
|           | 2002                  | -0.29 $\uparrow$                                                                                | –       | 0.04 $\uparrow^{**}$    | -0.25          |
|           | 2003                  | -0.32 $\uparrow^{**}$                                                                           | –       | 0.01                    | -0.31          |
|           | 2004                  | -0.39 $\downarrow^*$                                                                            | –       | 0.00                    | -0.39          |
|           | 2005                  | -0.35                                                                                           | –       | 0.01                    | -0.34          |
|           | 2006                  | -0.36                                                                                           | –       | 0.00                    | -0.36          |
|           | 2007                  | -0.30 $\uparrow$                                                                                | –       | 0.02 $\uparrow^*$       | -0.28          |
|           | 2008                  | -0.34                                                                                           | –       | 0.00                    | -0.34          |
|           | 2009                  | -0.39                                                                                           | –       | -0.03                   | -0.42          |
|           | 2010                  | -0.43 $\downarrow$                                                                              | –       | -0.06 $\downarrow$      | -0.49          |
|           | 2011                  | -0.36                                                                                           | –       | 0.02                    | -0.34          |
|           | 2012                  | -0.27 $\uparrow^*$                                                                              | –       | 0.04 $\uparrow^{**}$    | -0.23          |
|           | 2013                  | -0.33                                                                                           | –       | 0.00                    | -0.33          |
|           | 2014                  | -0.35                                                                                           | –       | -0.01                   | -0.36          |
|           | 2015                  | -0.47 $\downarrow^{**}$                                                                         | –       | -0.11 $\downarrow^{**}$ | -0.58          |
|           | 2016                  | -0.34                                                                                           | –       | 0.00                    | -0.34          |
|           | 2017                  | -0.40 $\downarrow$                                                                              | –       | -0.02                   | -0.42          |
|           | 2018                  | -0.38                                                                                           | –       | -0.03                   | -0.40          |
|           | 2019                  | -0.31 $\uparrow$                                                                                | –       | 0.03                    | -0.28          |
|           | Tot.2001–2019         | -6.76                                                                                           |         | -0.13                   | <u>-6.89</u>   |
|           | $\bar{X}_{2001-2019}$ | -0.36                                                                                           |         | -0.01                   |                |

GS: growing season.

"\*" and "\*\*": min and max decrease/peak, respectively.

"–": no data available.

**Table S3.3.** Growing season albedo-induced global warming impact ( $\text{GWI}_{\Delta\alpha_{\text{gs}}}$ ,  $\text{Mg C}_{\text{eq}} \text{ ha}^{-1} \text{ gs}^{-1}$ ) 2001–2019 for Ecoregion 56f. Cumulative  $\text{GWI}_{\Delta\alpha_{\text{gs}}}$  value for the entire ecoregion over the 19-year period is underlined. Major deviations (i.e., peaks ( $\uparrow$ ) and decreases ( $\downarrow$ )) from the  $\text{GWI}_{\Delta\alpha_{\text{gs}}}$  mean are also shown. Positive and negative values of  $\text{GWI}_{\Delta\alpha_{\text{gs}}}$  indicate growing season warming and cooling effects, respectively, equivalent to Carbon ( $\text{C}_{\text{eq}}$ ) emission and mitigation, respectively, 2001–2019.

| Ecoregion | GS                    | $\text{GWI}_{\Delta\alpha_{\text{gs}}} (\text{Mg C}_{\text{eq}} \text{ ha}^{-1} \text{ gs}^{-1})$ |                         |                         |                |
|-----------|-----------------------|---------------------------------------------------------------------------------------------------|-------------------------|-------------------------|----------------|
|           |                       | Cropland                                                                                          | Pasture                 | Urban                   | Tot.cover type |
| 56f       | 2001                  | -0.37                                                                                             | -0.27 $\downarrow$      | -0.03 $\downarrow$      | -0.67          |
|           | 2002                  | -0.28 $\uparrow$                                                                                  | -0.19 $\uparrow^{**}$   | 0.04 $\uparrow^{**}$    | -0.43          |
|           | 2003                  | -0.31 $\uparrow^{**}$                                                                             | -0.22                   | 0.01                    | -0.52          |
|           | 2004                  | -0.38                                                                                             | -0.24                   | 0.01                    | -0.61          |
|           | 2005                  | -0.35                                                                                             | -0.23                   | 0.02                    | -0.56          |
|           | 2006                  | -0.35                                                                                             | -0.26 $\downarrow^*$    | 0.01                    | -0.60          |
|           | 2007                  | -0.30 $\uparrow$                                                                                  | -0.17 $\uparrow$        | 0.03 $\uparrow$         | -0.44          |
|           | 2008                  | -0.33                                                                                             | -0.22                   | 0.00                    | -0.55          |
|           | 2009                  | -0.38                                                                                             | -0.26 $\downarrow^*$    | -0.02 $\downarrow^*$    | -0.66          |
|           | 2010                  | -0.42 $\downarrow$                                                                                | -0.27 $\downarrow$      | -0.05 $\downarrow$      | -0.75          |
|           | 2011                  | -0.35                                                                                             | -0.23                   | 0.03 $\uparrow^*$       | -0.55          |
|           | 2012                  | -0.27 $\uparrow^*$                                                                                | -0.14 $\uparrow^*$      | 0.04 $\uparrow^{**}$    | -0.37          |
|           | 2013                  | -0.32                                                                                             | -0.21                   | 0.01                    | -0.52          |
|           | 2014                  | -0.34                                                                                             | -0.27 $\downarrow$      | 0.00                    | -0.62          |
|           | 2015                  | -0.47 $\downarrow^{**}$                                                                           | -0.29 $\downarrow^{**}$ | -0.10 $\downarrow^{**}$ | -0.86          |
|           | 2016                  | -0.33                                                                                             | -0.22                   | 0.01                    | -0.54          |
|           | 2017                  | -0.40 $\downarrow^*$                                                                              | -0.24                   | -0.01                   | -0.64          |
|           | 2018                  | -0.37                                                                                             | -0.21                   | -0.02 $\downarrow^*$    | -0.60          |
|           | 2019                  | -0.31 $\uparrow^{**}$                                                                             | -0.18 $\uparrow$        | 0.04 $\uparrow^{**}$    | -0.46          |
|           | Tot.2001–2019         | -6.63                                                                                             | -4.31                   | 0.00                    | <u>-10.94</u>  |
|           | $\bar{X}_{2001-2019}$ | -0.35                                                                                             | -0.23                   | 0.00                    |                |

GS: growing season.

"\*" and "\*\*": min and max decrease/peak, respectively.

"-": no data available.

**Table S3.4.** Growing season albedo-induced global warming impact ( $\text{GWI}_{\Delta\alpha_{\text{gs}}}$ ,  $\text{Mg C}_{\text{eq}} \text{ha}^{-1} \text{gs}^{-1}$ ) 2001–2019 for Ecoregion 56g. Cumulative  $\text{GWI}_{\Delta\alpha_{\text{gs}}}$  value for the entire ecoregion over the 19-year period is underlined. Major deviations (i.e., peaks ( $\uparrow$ ) and decreases ( $\downarrow$ )) from the  $\text{GWI}_{\Delta\alpha_{\text{gs}}}$  mean are also shown. Positive and negative values of  $\text{GWI}_{\Delta\alpha_{\text{gs}}}$  indicate growing season warming and cooling effects, respectively, equivalent to Carbon ( $\text{C}_{\text{eq}}$ ) emission and mitigation, respectively, 2001–2019.

| Ecoregion | GS                    | $\text{GWI}_{\Delta\alpha_{\text{gs}}} (\text{Mg C}_{\text{eq}} \text{ha}^{-1} \text{gs}^{-1})$ |                         |                         |                |
|-----------|-----------------------|-------------------------------------------------------------------------------------------------|-------------------------|-------------------------|----------------|
|           |                       | Cropland                                                                                        | Pasture                 | Urban                   | Tot.cover type |
| 56g       | 2001                  | -0.36                                                                                           | -0.26 $\downarrow$      | -0.02 $\downarrow^*$    | -0.65          |
|           | 2002                  | -0.28 $\uparrow$                                                                                | -0.18 $\uparrow^{**}$   | 0.05 $\uparrow^*$       | -0.41          |
|           | 2003                  | -0.31 $\uparrow^{**}$                                                                           | -0.21                   | 0.02                    | -0.50          |
|           | 2004                  | -0.37                                                                                           | -0.23                   | 0.01                    | -0.59          |
|           | 2005                  | -0.34                                                                                           | -0.22                   | 0.02                    | -0.54          |
|           | 2006                  | -0.35                                                                                           | -0.25 $\downarrow$      | 0.02                    | -0.58          |
|           | 2007                  | -0.29 $\uparrow$                                                                                | -0.16 $\uparrow$        | 0.04 $\uparrow^*$       | -0.42          |
|           | 2008                  | -0.33                                                                                           | -0.22                   | 0.01                    | -0.53          |
|           | 2009                  | -0.37                                                                                           | -0.25 $\downarrow^*$    | -0.01                   | -0.64          |
|           | 2010                  | -0.41 $\downarrow$                                                                              | -0.27 $\downarrow$      | -0.05 $\downarrow$      | -0.73          |
|           | 2011                  | -0.34                                                                                           | -0.22                   | 0.03                    | -0.52          |
|           | 2012                  | -0.26 $\uparrow^*$                                                                              | -0.14 $\uparrow^*$      | 0.05 $\uparrow^{**}$    | -0.35          |
|           | 2013                  | -0.32                                                                                           | -0.20                   | 0.02                    | -0.51          |
|           | 2014                  | -0.34                                                                                           | -0.26 $\downarrow$      | 0.01                    | -0.59          |
|           | 2015                  | -0.46 $\downarrow^{**}$                                                                         | -0.29 $\downarrow^{**}$ | -0.09 $\downarrow^{**}$ | -0.84          |
|           | 2016                  | -0.32                                                                                           | -0.21                   | 0.01                    | -0.52          |
|           | 2017                  | -0.39 $\downarrow^*$                                                                            | -0.23                   | 0.00                    | -0.62          |
|           | 2018                  | -0.36                                                                                           | -0.20                   | -0.02                   | -0.58          |
|           | 2019                  | -0.30 $\uparrow$                                                                                | -0.18 $\uparrow^{**}$   | 0.04 $\uparrow^*$       | -0.44          |
|           | Tot.2001–2019         | -6.50                                                                                           | -4.19                   | 0.14                    | <u>-10.54</u>  |
|           | $\bar{X}_{2001-2019}$ | -0.34                                                                                           | -0.22                   | 0.01                    |                |

GS: growing season.

"\*" and "\*\*\*": min and max decrease/peak, respectively.

"-": no data available.

**Table S3.5.** Growing season albedo-induced global warming impact ( $\text{GWI}_{\Delta\alpha_{\text{gs}}}$ ,  $\text{Mg C}_{\text{eq}} \text{ha}^{-1} \text{gs}^{-1}$ ) 2001–2019 for Ecoregion 56h. Cumulative  $\text{GWI}_{\Delta\alpha_{\text{gs}}}$  value for the entire ecoregion over the 19-year period is underlined. Major deviations (i.e., peaks ( $\uparrow$ ) and decreases ( $\downarrow$ )) from the  $\text{GWI}_{\Delta\alpha_{\text{gs}}}$  mean are also shown. Positive and negative values of  $\text{GWI}_{\Delta\alpha_{\text{gs}}}$  indicate growing season warming and cooling effects, respectively, equivalent to Carbon ( $\text{C}_{\text{eq}}$ ) emission and mitigation, respectively, 2001–2019.

| Ecoregion | GS                    | $\text{GWI}_{\Delta\alpha_{\text{gs}}} (\text{Mg C}_{\text{eq}} \text{ha}^{-1} \text{gs}^{-1})$ |                         |                         |                |
|-----------|-----------------------|-------------------------------------------------------------------------------------------------|-------------------------|-------------------------|----------------|
|           |                       | Cropland                                                                                        | Pasture                 | Urban                   | Tot.cover type |
| 56h       | 2001                  | -0.37                                                                                           | -0.26                   | -0.03 $\downarrow$      | -0.65          |
|           | 2002                  | -0.28 $\uparrow$                                                                                | -0.17 $\uparrow^{**}$   | 0.04 $\uparrow$         | -0.42          |
|           | 2003                  | -0.31 $\uparrow^{**}$                                                                           | -0.20                   | 0.01                    | -0.51          |
|           | 2004                  | -0.38                                                                                           | -0.22                   | 0.00                    | -0.60          |
|           | 2005                  | -0.35                                                                                           | -0.21                   | 0.01 $\uparrow^*$       | -0.55          |
|           | 2006                  | -0.35                                                                                           | -0.24 $\downarrow^*$    | 0.01                    | -0.59          |
|           | 2007                  | -0.30 $\uparrow$                                                                                | -0.16 $\uparrow$        | 0.03 $\uparrow$         | -0.43          |
|           | 2008                  | -0.33                                                                                           | -0.21                   | 0.00                    | -0.54          |
|           | 2009                  | -0.38                                                                                           | -0.25 $\downarrow$      | -0.02 $\downarrow^*$    | -0.65          |
|           | 2010                  | -0.42 $\downarrow$                                                                              | -0.26 $\downarrow$      | -0.06 $\downarrow$      | -0.73          |
|           | 2011                  | -0.35                                                                                           | -0.21                   | 0.02 $\uparrow$         | -0.53          |
|           | 2012                  | -0.27 $\uparrow^*$                                                                              | -0.13 $\uparrow^*$      | 0.04 $\uparrow^{**}$    | -0.36          |
|           | 2013                  | -0.33                                                                                           | -0.20                   | 0.01                    | -0.51          |
|           | 2014                  | -0.34                                                                                           | -0.25 $\downarrow$      | 0.00                    | -0.60          |
|           | 2015                  | -0.47 $\downarrow^{**}$                                                                         | -0.28 $\downarrow^{**}$ | -0.10 $\downarrow^{**}$ | -0.85          |
|           | 2016                  | -0.33                                                                                           | -0.20                   | 0.01                    | -0.53          |
|           | 2017                  | -0.40 $\downarrow^*$                                                                            | -0.22                   | -0.01 $\downarrow$      | -0.63          |
|           | 2018                  | -0.37                                                                                           | -0.19                   | -0.02 $\downarrow^*$    | -0.59          |
|           | 2019                  | -0.31 $\uparrow^{**}$                                                                           | -0.17 $\uparrow^{**}$   | 0.03 $\uparrow$         | -0.44          |
|           | Tot.2001–2019         | -6.64                                                                                           | -4.04                   | -0.02                   | <u>-10.71</u>  |
|           | $\bar{X}_{2001-2019}$ | -0.35                                                                                           | -0.21                   | 0.00                    |                |

GS: growing season.

"\*" and "\*\*\*": min and max decrease/peak, respectively.

"-": no data available.

**Table S4.1.** Monthly albedo-induced global warming impact ( $\text{GWI}_{\Delta\alpha\text{mo}}$ ,  $\text{Mg C}_{\text{eq}} \text{ ha}^{-1} \text{ mo}^{-1}$ ) January–December for Ecoregion 56b. Cumulative  $\text{GWI}_{\Delta\alpha\text{mo}}$  value for the entire ecoregion over the 11-month period is underlined. Positive and negative values of  $\text{GWI}_{\Delta\alpha\text{mo}}$  indicate monthly warming and cooling effects, respectively, equivalent to Carbon ( $\text{C}_{\text{eq}}$ ) emission and mitigation, respectively, during the 19-year period.

| Ecoregion | Month                      | $\text{GWI}_{\Delta\alpha\text{mo}}$ ( $\text{Mg C}_{\text{eq}} \text{ ha}^{-1} \text{ mo}^{-1}$ ) |         |       |                |
|-----------|----------------------------|----------------------------------------------------------------------------------------------------|---------|-------|----------------|
|           |                            | Cropland                                                                                           | Pasture | Urban | Tot.cover type |
| 56b       | Jan                        | -1.50                                                                                              | -1.11   | -0.54 | -3.16          |
|           | Feb                        | -2.15                                                                                              | -1.64   | -0.64 | -4.43          |
|           | Apr                        | -0.50                                                                                              | -0.41   | -0.15 | -1.06          |
|           | May                        | -0.50                                                                                              | -0.40   | -0.08 | -0.98          |
|           | Jun                        | -0.28                                                                                              | -0.26   | 0.09  | -0.45          |
|           | Jul                        | -0.32                                                                                              | -0.22   | 0.09  | -0.45          |
|           | Aug                        | -0.35                                                                                              | -0.19   | 0.05  | -0.49          |
|           | Sep                        | -0.29                                                                                              | -0.18   | 0.01  | -0.46          |
|           | Oct                        | -0.18                                                                                              | -0.14   | -0.02 | -0.34          |
|           | Nov                        | -0.23                                                                                              | -0.17   | -0.09 | -0.48          |
|           | Dec                        | -1.21                                                                                              | -0.91   | -0.46 | -2.58          |
|           | Tot.Jan–Dec                | -7.52                                                                                              | -5.63   | -1.75 | <u>-14.89</u>  |
|           | $\bar{X}_{\text{Jan–Dec}}$ | -0.68                                                                                              | -0.51   | -0.16 |                |

“–”: no data available.

**Table S4.2.** Monthly albedo-induced global warming impact ( $\text{GWI}_{\Delta\alpha\text{mo}}$ ,  $\text{Mg C}_{\text{eq}} \text{ ha}^{-1} \text{ mo}^{-1}$ ) January–December for Ecoregion 56d. Cumulative  $\text{GWI}_{\Delta\alpha\text{mo}}$  value for the entire ecoregion over the 11-month period is underlined. Positive and negative values of  $\text{GWI}_{\Delta\alpha\text{mo}}$  indicate monthly warming and cooling effects, respectively, equivalent to Carbon ( $\text{C}_{\text{eq}}$ ) emission and mitigation, respectively, during the 19-year period.

| Ecoregion | Month | $\text{GWI}_{\Delta\alpha\text{mo}}$ ( $\text{Mg C}_{\text{eq}} \text{ ha}^{-1} \text{ mo}^{-1}$ ) |         |       |                |
|-----------|-------|----------------------------------------------------------------------------------------------------|---------|-------|----------------|
|           |       | Cropland                                                                                           | Pasture | Urban | Tot.cover type |
| 56d       | Jan   | -1.49                                                                                              | –       | -0.58 | -2.07          |
|           | Feb   | -2.11                                                                                              | –       | -0.70 | -2.82          |
|           | Apr   | -0.51                                                                                              | –       | -0.16 | -0.67          |
|           | May   | -0.51                                                                                              | –       | -0.09 | -0.60          |



|                            |       |   |       |              |
|----------------------------|-------|---|-------|--------------|
| Jun                        | -0.28 | – | 0.08  | -0.20        |
| Jul                        | -0.32 | – | 0.08  | -0.25        |
| Aug                        | -0.35 | – | 0.04  | -0.31        |
| Sep                        | -0.29 | – | 0.01  | -0.28        |
| Oct                        | -0.18 | – | -0.02 | -0.21        |
| Nov                        | -0.23 | – | -0.09 | -0.32        |
| Dec                        | -1.21 | – | -0.48 | -1.70        |
| Tot, Jan–Dec               | -7.50 |   | -1.92 | <b>-9.42</b> |
| $\bar{X}_{\text{Jan–Dec}}$ | -0.68 |   | -0.17 |              |

“–”: no data available.

**Table S4.3.** Monthly albedo-induced global warming impact ( $\text{GWI}_{\Delta\alpha\text{mo}}$ ,  $\text{Mg C}_{\text{eq}} \text{ ha}^{-1} \text{ mo}^{-1}$ ) January–December for Ecoregion 56f. Cumulative  $\text{GWI}_{\Delta\alpha\text{mo}}$  value for the entire ecoregion over the 11-month period is underlined. Positive and negative values of  $\text{GWI}_{\Delta\alpha\text{mo}}$  indicate monthly warming and cooling effects, respectively, equivalent to Carbon ( $\text{C}_{\text{eq}}$ ) emission and mitigation, respectively, during the 19-year period.

| Ecoregion | Month        | $\text{GWI}_{\Delta\alpha\text{mo}}$ ( $\text{Mg C}_{\text{eq}} \text{ ha}^{-1} \text{ mo}^{-1}$ ) |         |       |                  |
|-----------|--------------|----------------------------------------------------------------------------------------------------|---------|-------|------------------|
|           |              | Cropland                                                                                           | Pasture | Urban | Tot., cover type |
| 56f       | Jan          | -1.48                                                                                              | -1.04   | -0.53 | -3.05            |
|           | Feb          | -2.11                                                                                              | -1.53   | -0.64 | -4.27            |
|           | Apr          | -0.50                                                                                              | -0.38   | -0.15 | -1.03            |
|           | May          | -0.49                                                                                              | -0.37   | -0.08 | -0.94            |
|           | Jun          | -0.27                                                                                              | -0.24   | 0.09  | -0.42            |
|           | Jul          | -0.32                                                                                              | -0.20   | 0.09  | -0.42            |
|           | Aug          | -0.34                                                                                              | -0.17   | 0.06  | -0.46            |
|           | Sep          | -0.29                                                                                              | -0.16   | 0.02  | -0.43            |
|           | Oct          | -0.18                                                                                              | -0.13   | -0.02 | -0.33            |
|           | Nov          | -0.23                                                                                              | -0.16   | -0.09 | -0.47            |
|           | Dec          | -1.19                                                                                              | -0.85   | -0.45 | -2.49            |
|           | Tot, Jan–Dec | -7.39                                                                                              | -5.23   | -1.70 | <u>-14.32</u>    |

---

$\bar{X}_{\text{Jan-Dec}}$       -0.67      -0.48      -0.15

---

“–”: no data available.

**Table S4.4.** Monthly albedo-induced global warming impact ( $\text{GWI}_{\Delta\alpha\text{gs}}$ ,  $\text{Mg C}_{\text{eq}} \text{ ha}^{-1} \text{ mo}^{-1}$ ) January–December for Ecoregion 56g. Cumulative  $\text{GWI}_{\Delta\alpha\text{mo}}$  value for the entire ecoregion over the 11-month period is underlined. Positive and negative values of  $\text{GWI}_{\Delta\alpha\text{mo}}$  indicate monthly warming and cooling effects, respectively, equivalent to Carbon ( $\text{C}_{\text{eq}}$ ) emission and mitigation, respectively, during the 19-year period.

| Ecoregion | Month                      | $\text{GWI}_{\Delta\alpha\text{mo}}$ ( $\text{Mg C}_{\text{eq}} \text{ ha}^{-1} \text{ mo}^{-1}$ ) |         |       |                |
|-----------|----------------------------|----------------------------------------------------------------------------------------------------|---------|-------|----------------|
|           |                            | Cropland                                                                                           | Pasture | Urban | Tot.cover type |
| 56g       | Jan                        | -1.47                                                                                              | -1.05   | -0.53 | -3.05          |
|           | Feb                        | -2.10                                                                                              | -1.54   | -0.62 | -4.26          |
|           | Apr                        | -0.49                                                                                              | -0.38   | -0.14 | -1.01          |
|           | May                        | -0.48                                                                                              | -0.37   | -0.07 | -0.92          |
|           | Jun                        | -0.26                                                                                              | -0.23   | 0.10  | -0.40          |
|           | Jul                        | -0.31                                                                                              | -0.20   | 0.10  | -0.40          |
|           | Aug                        | -0.34                                                                                              | -0.17   | 0.06  | -0.44          |
|           | Sep                        | -0.28                                                                                              | -0.16   | 0.02  | -0.42          |
|           | Oct                        | -0.18                                                                                              | -0.13   | -0.02 | -0.32          |
|           | Nov                        | -0.22                                                                                              | -0.16   | -0.09 | -0.47          |
|           | Dec                        | -1.19                                                                                              | -0.86   | -0.45 | -2.49          |
|           | Tot.Jan-Dec                | -7.31                                                                                              | -5.26   | -1.62 | <u>-14.19</u>  |
|           | $\bar{X}_{\text{Jan-Dec}}$ | -0.66                                                                                              | -0.48   | -0.15 |                |

---

“–”: no data available.

**Table S4.5.** Monthly albedo-induced global warming impact ( $\text{GWI}_{\Delta\alpha\text{mo}}$ ,  $\text{Mg C}_{\text{eq}} \text{ha}^{-1} \text{mo}^{-1}$ ) January–December for Ecoregion 56h. Cumulative  $\text{GWI}_{\Delta\alpha\text{mo}}$  value for the entire ecoregion over the 11-month period is underlined. Positive and negative values of  $\text{GWI}_{\Delta\alpha\text{mo}}$  indicate monthly warming and cooling effects, respectively, equivalent to Carbon ( $\text{C}_{\text{eq}}$ ) emission and mitigation, respectively, during the 19-year period.

| Ecoregion | Month                      | $\text{GWI}_{\Delta\alpha\text{mo}}$ ( $\text{Mg C}_{\text{eq}} \text{ha}^{-1} \text{mo}^{-1}$ ) |         |       |                |
|-----------|----------------------------|--------------------------------------------------------------------------------------------------|---------|-------|----------------|
|           |                            | Cropland                                                                                         | Pasture | Urban | Tot.cover type |
| 56h       | Jan                        | -1.48                                                                                            | –       | -0.54 | -2.02          |
|           | Feb                        | -2.12                                                                                            | –       | -0.64 | -2.76          |
|           | Apr                        | -0.50                                                                                            | –       | -0.15 | -0.65          |
|           | May                        | -0.49                                                                                            | –       | -0.08 | -0.57          |
|           | Jun                        | -0.27                                                                                            | –       | 0.09  | -0.19          |
|           | Jul                        | -0.32                                                                                            | –       | 0.09  | -0.23          |
|           | Aug                        | -0.35                                                                                            | –       | 0.05  | -0.29          |
|           | Sep                        | -0.29                                                                                            | –       | 0.01  | -0.27          |
|           | Oct                        | -0.18                                                                                            | –       | -0.02 | -0.20          |
|           | Nov                        | -0.23                                                                                            | –       | -0.09 | -0.31          |
|           | Dec                        | -1.20                                                                                            | –       | -0.46 | -1.65          |
|           | Tot.Jan–Dec                | -7.41                                                                                            |         | -1.73 | <u>-9.14</u>   |
|           | $\bar{X}_{\text{Jan–Dec}}$ | -0.67                                                                                            |         | -0.16 |                |

“–”: no data available.

**Table S5.** Nested analysis of variance (ANOVA with repeated measurements), among and within ecoregions, based on the linear models (see Equations (5) and (6) in the main text). Dependent variables:  $\text{GWI}_{\Delta\alpha\text{gs}}$  ( $\text{Mg C}_{\text{eq}} \text{ha}^{-1} \text{gs}^{-1}$ ) and  $\text{GWI}_{\Delta\alpha\text{mo}}$  ( $\text{Mg C}_{\text{eq}} \text{ha}^{-1} \text{gs}^{-1}$ ).

|                 | Variable                             | DF  | SS   | MS   | F       | p   | $\eta^2$ (%)       |
|-----------------|--------------------------------------|-----|------|------|---------|-----|--------------------|
| Among Ecoregion | Ecoregions                           | 4   | 0.00 | 0.00 | 860.57  | *** | 32.04 <sup>a</sup> |
|                 | Cover type                           | 1   | 5.80 | 5.80 | 4786.41 | *** | 94.81              |
|                 | Ecoregions × cover type              | 4   | 0.00 | 0.00 | 182.84  | *** | 51.83 <sup>a</sup> |
|                 | Residuals                            | 162 | 0.02 | 0.00 |         |     |                    |
|                 | Ecoregions                           | 4   | 0.01 | 0.00 | 24.17   |     | 28.53 <sup>a</sup> |
|                 | Cover type                           | 1   | 7.34 | 7.34 | 19.05   | *** | 23.52              |
|                 | Ecoregions × cover type              | 4   | 0.00 | 0.00 | 3.61    |     | 25.61 <sup>a</sup> |
|                 | Residuals                            | 90  | 3.86 | 0.39 |         |     |                    |
| With in         | $\text{GWI}_{\Delta\alpha\text{gs}}$ |     |      |      |         |     |                    |
|                 | Cover type                           | 2   | 5.94 | 2.97 | 12185   | *** | 99.00              |

|                     |            |     |      |      |        |           |
|---------------------|------------|-----|------|------|--------|-----------|
|                     | Residuals  | 245 | 0.06 | 0.00 |        |           |
| GWI <sub>Δamo</sub> | Cover type | 2   | 7.47 | 2.67 | 122.80 | *** 65.40 |
|                     | Residuals  | 130 | 3.95 | 0.03 |        |           |

GWI<sub>Δags</sub> and GWI<sub>Δamo</sub>: albedo-induced global warming impact (GWI<sub>Δa</sub>) at growing season and monthly periods, respectively.

Signif. codes: \*\*\* p-value < 0.001, \*\* p-value < 0.01, \* p-value < 0.05, · p-value < 0.1, p-value > 0.1.

η<sup>2</sup>: generalized eta squares indicating the variance in the dependent variable (i.e., GWI<sub>Δa</sub>) accounted for by the independent variables (i.e., ecoregion, cover type, and their interactions).

“a”: η<sup>2</sup> values obtained from the Mauchly’s test of sphericity by applying the Greenhouse-Geisser correction.

**Table S6.** Overall percent contribution and percent contribution higher than the average (>8%; i.e., 1/12<sup>th</sup> of the total, i.e., equal contribution across the 12-month period) of albedo-induced global warming impact (GWI<sub>Δa</sub>) by season and month in the five Level IV ecoregions. Cooling effects showing the contributions higher than the average are underlined.

| Overall contribution (%) |     |     |     |     |     | Contribution higher than the average (%) |            |            |            |            |
|--------------------------|-----|-----|-----|-----|-----|------------------------------------------|------------|------------|------------|------------|
| Level IV ecoregions      |     |     |     |     |     |                                          |            |            |            |            |
| months                   | 56b | 56d | 56f | 56g | 56h | 56b                                      | 56d        | 56f        | 56g        | 56h        |
| NGS                      | 73  | 75  | 73  | 73  | 74  | <u>100</u>                               | <u>100</u> | <u>100</u> | <u>100</u> | <u>100</u> |
| GS                       | 27  | 25  | 27  | 27  | 26  | 0                                        | 0          | 0          | 0          | 0          |

NGS: non-growing season months (January, February, March, and December).

GS: growing season months (April–November).

**Table S7.** Percent contribution higher than the average (>8%; i.e., 1/12<sup>th</sup> of the total, i.e., equal contribution across the 12-month period) of albedo-induced global warming impact (GWI<sub>Δa</sub>) by season and month for cropland, pasture, and urban in the five Level IV ecoregions.

| Contribution higher than the average (%) |        |          |         |       |
|------------------------------------------|--------|----------|---------|-------|
| Cover type                               |        |          |         |       |
| Ecoregion                                | Months | Cropland | Pasture | Urban |
| 56b                                      | NGS    | 100      | 100     | 100   |
|                                          | GS     | 0        | 0       | 0     |
| 56d                                      | NGS    | 100      | –       | 100   |
|                                          | GS     | 0        | –       | 0     |
| 56f                                      | NGS    | 100      | 100     | 100   |
|                                          | GS     | 0        | 0       | 0     |
| 56g                                      | NGS    | 100      | 100     | 100   |
|                                          | GS     | 0        | 0       | 0     |
| 56h                                      | NGS    | 100      | –       | 100   |
|                                          | GS     | 0        | –       | 0     |

NGS: non-growing season months (January, February, March, and December).

GS: growing season months (April–November).

“–”: no data available.

**Table S8.1.** Growing season albedo-induced radiative forcing ( $RF_{\Delta\alpha_{gs}}$ ,  $W\ m^{-2}$ ) 2001–2019 for Ecoregion 56b. Cumulative  $RF_{\Delta\alpha_{gs}}$  value for the entire ecoregion over the 19-year period is underlined. Positive and negative values of  $RF_{\Delta\alpha_{gs}}$  indicate growing season warming and cooling effects, respectively.

| Ecoregion | GS                    | $RF_{\Delta\alpha_{gs}}$ ( $W\ m^{-2}$ ) |         |        |                |
|-----------|-----------------------|------------------------------------------|---------|--------|----------------|
|           |                       | Cropland                                 | Pasture | Urban  | Tot.cover type |
| 56b       | 2001                  | -5.08                                    | -3.91   | -0.44  | -9.43          |
|           | 2002                  | -3.93                                    | -2.73   | 0.57   | -6.10          |
|           | 2003                  | -4.35                                    | -3.12   | 0.12   | -7.35          |
|           | 2004                  | -5.28                                    | -3.44   | 0.04   | -8.67          |
|           | 2005                  | -4.83                                    | -3.33   | 0.19   | -7.97          |
|           | 2006                  | -4.91                                    | -3.74   | 0.10   | -8.55          |
|           | 2007                  | -4.13                                    | -2.48   | 0.38   | -6.22          |
|           | 2008                  | -4.63                                    | -3.27   | 0.03   | -7.87          |
|           | 2009                  | -5.27                                    | -3.79   | -0.28  | -9.34          |
|           | 2010                  | -5.79                                    | -3.96   | -0.78  | -10.53         |
|           | 2011                  | -4.83                                    | -3.29   | 0.33   | -7.79          |
|           | 2012                  | -3.71                                    | -2.14   | 0.56   | -5.28          |
|           | 2013                  | -4.50                                    | -3.05   | 0.10   | -7.45          |
|           | 2014                  | -4.76                                    | -3.89   | -0.05  | -8.70          |
|           | 2015                  | -6.46                                    | -4.27   | -1.37  | -12.10         |
|           | 2016                  | -4.55                                    | -3.15   | 0.06   | -7.64          |
|           | 2017                  | -5.52                                    | -3.44   | -0.18  | -9.14          |
|           | 2018                  | -5.11                                    | -3.03   | -0.35  | -8.49          |
|           | 2019                  | -4.26                                    | -2.71   | 0.47   | -6.49          |
|           | Tot.2001–2019         | -91.90                                   | -62.73  | -0.48  | <u>-155.11</u> |
|           | $\bar{X}_{2001-2019}$ | -4.84                                    | -3.30   | -0.025 |                |

GS: growing season.

“–”: no data available.

**Table S8.2.** Growing season albedo-induced radiative forcing ( $RF_{\Delta\alpha_{gs}}$ ,  $W\ m^{-2}$ ) 2001–2019 for Ecoregion 56d. Cumulative  $RF_{\Delta\alpha_{gs}}$  value for the entire ecoregion over the 19-year period is underlined. Positive and negative values of  $RF_{\Delta\alpha_{gs}}$  indicate growing season warming and cooling effects, respectively.

| Ecoregion | GS                    | $RF_{\Delta\alpha_{gs}}$ ( $W\ m^{-2}$ ) |         |        |                |
|-----------|-----------------------|------------------------------------------|---------|--------|----------------|
|           |                       | Cropland                                 | Pasture | Urban  | Tot.cover type |
| 56d       | 2001                  | -5.11                                    | –       | -0.52  | -5.64          |
|           | 2002                  | -3.96                                    | –       | 0.50   | -3.46          |
|           | 2003                  | -4.36                                    | –       | 0.08   | -4.28          |
|           | 2004                  | -5.32                                    | –       | -0.04  | -5.36          |
|           | 2005                  | -4.83                                    | –       | 0.13   | -4.69          |
|           | 2006                  | -4.94                                    | –       | 0.00   | -4.94          |
|           | 2007                  | -4.13                                    | –       | 0.32   | -3.81          |
|           | 2008                  | -4.65                                    | –       | -0.04  | -4.69          |
|           | 2009                  | -5.31                                    | –       | -0.37  | -5.68          |
|           | 2010                  | -5.80                                    | –       | -0.84  | -6.64          |
|           | 2011                  | -4.86                                    | –       | 0.23   | -4.62          |
|           | 2012                  | -3.70                                    | –       | 0.52   | -3.18          |
|           | 2013                  | -4.50                                    | –       | 0.05   | -4.45          |
|           | 2014                  | -4.79                                    | –       | -0.14  | -4.92          |
|           | 2015                  | -6.47                                    | –       | -1.44  | -7.90          |
|           | 2016                  | -4.58                                    | –       | -0.01  | -4.59          |
|           | 2017                  | -5.52                                    | –       | -0.24  | -5.76          |
|           | 2018                  | -5.12                                    | –       | -0.39  | -5.51          |
|           | 2019                  | -4.27                                    | –       | 0.39   | -3.88          |
|           | Tot.2001–2019         | -92.21                                   |         | -1.80  | <u>-94.00</u>  |
|           | $\bar{X}_{2001-2019}$ | -4.85                                    |         | -0.095 |                |

GS: growing season.

“–”: no data available.

**Table S8.3.** Growing season albedo-induced radiative forcing ( $RF_{\Delta\alpha_{gs}}$ ,  $W\ m^{-2}$ ) 2001–2019 for Ecoregion 56f. Cumulative  $RF_{\Delta\alpha_{gs}}$  value for the entire ecoregion over the 19-year period is underlined. Positive and negative values of  $RF_{\Delta\alpha_{gs}}$  indicate growing season warming and cooling effects, respectively.

| Ecoregion | GS                    | $RF_{\Delta\alpha_{gs}}$ ( $W\ m^{-2}$ ) |         |       |                |
|-----------|-----------------------|------------------------------------------|---------|-------|----------------|
|           |                       | Cropland                                 | Pasture | Urban | Tot.cover type |
| 56f       | 2001                  | -5.00                                    | -3.69   | -0.41 | -9.10          |
|           | 2002                  | -3.87                                    | -2.56   | 0.59  | -5.84          |
|           | 2003                  | -4.28                                    | -2.94   | 0.15  | -7.08          |
|           | 2004                  | -5.21                                    | -3.23   | 0.07  | -8.36          |
|           | 2005                  | -4.75                                    | -3.12   | 0.22  | -7.65          |
|           | 2006                  | -4.84                                    | -3.53   | 0.12  | -8.25          |
|           | 2007                  | -4.05                                    | -2.30   | 0.41  | -5.94          |
|           | 2008                  | -4.55                                    | -3.07   | 0.05  | -7.57          |
|           | 2009                  | -5.19                                    | -3.56   | -0.26 | -9.01          |
|           | 2010                  | -5.71                                    | -3.73   | -0.74 | -10.18         |
|           | 2011                  | -4.76                                    | -3.09   | 0.35  | -7.50          |
|           | 2012                  | -3.64                                    | -1.97   | 0.59  | -5.03          |
|           | 2013                  | -4.43                                    | -2.86   | 0.13  | -7.15          |
|           | 2014                  | -4.69                                    | -3.68   | -0.03 | -8.41          |
|           | 2015                  | -6.37                                    | -4.02   | -1.32 | -11.70         |
|           | 2016                  | -4.47                                    | -2.95   | 0.09  | -7.34          |
|           | 2017                  | -5.44                                    | -3.22   | -0.14 | -8.80          |
|           | 2018                  | -5.04                                    | -2.83   | -0.31 | -8.18          |
|           | 2019                  | -4.18                                    | -2.52   | 0.49  | -6.21          |
|           | Tot.2001–2019         | -90.48                                   | -58.87  | 0.04  | <u>-149.31</u> |
|           | $\bar{X}_{2001-2019}$ | -4.76                                    | -3.10   | 0.002 |                |

GS: growing season.

“–”: no data available.

**Table S8.4.** Growing season albedo-induced radiative forcing ( $RF_{\Delta\alpha_{gs}}$ ,  $W\ m^{-2}$ ) 2001–2019 for Ecoregion 56g. Cumulative  $RF_{\Delta\alpha_{gs}}$  value for the entire ecoregion over the 19-year period is underlined. Positive and negative values of  $RF_{\Delta\alpha_{gs}}$  indicate growing season warming and cooling effects, respectively.

| Ecoregion | GS                    | $RF_{\Delta\alpha_{gs}}$ ( $W\ m^{-2}$ ) |         |       |                |
|-----------|-----------------------|------------------------------------------|---------|-------|----------------|
|           |                       | Cropland                                 | Pasture | Urban | Tot.cover type |
| 56g       | 2001                  | -4.90                                    | -3.61   | -0.31 | -8.81          |
|           | 2002                  | -3.78                                    | -2.46   | 0.69  | -5.55          |
|           | 2003                  | -4.19                                    | -2.84   | 0.23  | -6.81          |
|           | 2004                  | -5.10                                    | -3.12   | 0.17  | -8.05          |
|           | 2005                  | -4.68                                    | -3.03   | 0.31  | -7.40          |
|           | 2006                  | -4.73                                    | -3.43   | 0.24  | -7.92          |
|           | 2007                  | -3.98                                    | -2.21   | 0.50  | -5.69          |
|           | 2008                  | -4.46                                    | -2.98   | 0.16  | -7.29          |
|           | 2009                  | -5.08                                    | -3.47   | -0.14 | -8.70          |
|           | 2010                  | -5.61                                    | -3.65   | -0.65 | -9.90          |
|           | 2011                  | -4.66                                    | -2.97   | 0.47  | -7.16          |
|           | 2012                  | -3.57                                    | -1.88   | 0.67  | -4.79          |
|           | 2013                  | -4.35                                    | -2.77   | 0.22  | -6.90          |
|           | 2014                  | -4.58                                    | -3.58   | 0.09  | -8.07          |
|           | 2015                  | -6.26                                    | -3.95   | -1.23 | -11.44         |
|           | 2016                  | -4.38                                    | -2.86   | 0.19  | -7.05          |
|           | 2017                  | -5.34                                    | -3.13   | -0.05 | -8.53          |
|           | 2018                  | -4.95                                    | -2.75   | -0.24 | -7.94          |
|           | 2019                  | -4.11                                    | -2.42   | 0.59  | -5.94          |
|           | Tot.2001–2019         | -88.70                                   | -57.13  | 1.91  | <u>-143.92</u> |
|           | $\bar{X}_{2001-2019}$ | -4.67                                    | -3.01   | 0.100 |                |

GS: growing season.

“–”: no data available.



**Table S8.5.** Growing season albedo-induced radiative forcing ( $RF_{\Delta\alpha_{gs}}$ ,  $W\ m^{-2}$ ) 2001–2019 for Ecoregion 56h. Cumulative  $RF_{\Delta\alpha_{gs}}$  value for the entire ecoregion over the 19-year period is underlined. Positive and negative values of  $RF_{\Delta\alpha_{gs}}$  indicate growing season warming and cooling effects, respectively.

| Ecoregion | GS                    | $RF_{\Delta\alpha_{gs}}$ ( $W\ m^{-2}$ ) |         |        |                |
|-----------|-----------------------|------------------------------------------|---------|--------|----------------|
|           |                       | Cropland                                 | Pasture | Urban  | Tot.cover type |
| 56h       | 2001                  | -5.00                                    | -3.51   | -0.43  | -8.94          |
|           | 2002                  | -3.88                                    | -2.36   | 0.56   | -5.67          |
|           | 2003                  | -4.28                                    | -2.74   | 0.12   | -6.91          |
|           | 2004                  | -5.20                                    | -3.00   | 0.05   | -8.16          |
|           | 2005                  | -4.77                                    | -2.91   | 0.19   | -7.49          |
|           | 2006                  | -4.84                                    | -3.31   | 0.10   | -8.06          |
|           | 2007                  | -4.07                                    | -2.12   | 0.38   | -5.81          |
|           | 2008                  | -4.56                                    | -2.88   | 0.04   | -7.41          |
|           | 2009                  | -5.19                                    | -3.37   | -0.27  | -8.83          |
|           | 2010                  | -5.71                                    | -3.55   | -0.76  | -10.01         |
|           | 2011                  | -4.77                                    | -2.86   | 0.34   | -7.29          |
|           | 2012                  | -3.66                                    | -1.79   | 0.56   | -4.89          |
|           | 2013                  | -4.44                                    | -2.67   | 0.11   | -7.00          |
|           | 2014                  | -4.69                                    | -3.47   | -0.04  | -8.20          |
|           | 2015                  | -6.36                                    | -3.86   | -1.33  | -11.56         |
|           | 2016                  | -4.48                                    | -2.77   | 0.07   | -7.18          |
|           | 2017                  | -5.44                                    | -3.02   | -0.17  | -8.63          |
|           | 2018                  | -5.04                                    | -2.66   | -0.34  | -8.03          |
|           | 2019                  | -4.20                                    | -2.32   | 0.47   | -6.05          |
|           | Tot.2001–2019         | -90.61                                   | -55.17  | -0.34  | <u>-146.12</u> |
|           | $\bar{X}_{2001-2019}$ | -4.77                                    | -2.90   | -0.018 |                |

GS: growing season.

“–”: no data available.

**Table S9.1.** Monthly albedo-induced radiative forcing ( $RF_{\Delta\alpha_{mo}}$ ,  $W\ m^{-2}$ ) January–December for Ecoregion 56b. Cumulative  $RF_{\Delta\alpha_{mo}}$  value for the entire ecoregion over the 11-month period is underlined. Positive and negative values of  $RF_{\Delta\alpha_{mo}}$  indicate monthly warming and cooling effects, respectively.

| Ecoregion | Month               | $RF_{\Delta\alpha_{mo}}$ ( $W\ m^{-2}$ ) |         |        |                |
|-----------|---------------------|------------------------------------------|---------|--------|----------------|
|           |                     | Cropland                                 | Pasture | Urban  | Tot.cover type |
| 56b       | Jan                 | -20.51                                   | -15.17  | -7.40  | -43.08         |
|           | Feb                 | -29.29                                   | -22.39  | -8.80  | -60.48         |
|           | Apr                 | -6.87                                    | -5.55   | -2.08  | -14.51         |
|           | May                 | -6.80                                    | -5.50   | -1.07  | -13.37         |
|           | Jun                 | -3.80                                    | -3.49   | 1.21   | -6.08          |
|           | Jul                 | -4.39                                    | -3.01   | 1.21   | -6.19          |
|           | Aug                 | -4.80                                    | -2.63   | 0.73   | -6.70          |
|           | Sep                 | -3.98                                    | -2.46   | 0.19   | -6.25          |
|           | Oct                 | -2.46                                    | -1.88   | -0.34  | -4.69          |
|           | Nov                 | -3.12                                    | -2.27   | -1.21  | -6.60          |
|           | Dec                 | -16.55                                   | -12.44  | -6.28  | -35.27         |
|           | Tot.Jan–Dec         | -102.58                                  | -76.80  | -23.84 | <u>-203.22</u> |
|           | $\bar{X}_{Jan-Dec}$ | -9.33                                    | -6.98   | -2.17  |                |

“–”: no data available.

**Table S9.2.** Monthly albedo-induced radiative forcing ( $RF_{\Delta\alpha_{mo}}$ ,  $W\ m^{-2}$ ) January–December for Ecoregion 56d. Cumulative  $RF_{\Delta\alpha_{mo}}$  value for the entire ecoregion over the 11-month period is underlined. Positive and negative values of  $RF_{\Delta\alpha_{mo}}$  indicate monthly warming and cooling effects, respectively.

| Ecoregion | Month | $RF_{\Delta\alpha_{mo}}$ ( $W\ m^{-2}$ ) |         |       |                |
|-----------|-------|------------------------------------------|---------|-------|----------------|
|           |       | Cropland                                 | Pasture | Urban | Tot.cover type |
| 56d       | Jan   | -20.35                                   | –       | -7.89 | -28.24         |
|           | Feb   | -28.84                                   | –       | -9.59 | -38.43         |
|           | Apr   | -6.95                                    | –       | -2.17 | -9.11          |
|           | May   | -6.95                                    | –       | -1.27 | -8.22          |

|                            |         |   |        |                |
|----------------------------|---------|---|--------|----------------|
| Jun                        | -3.85   | – | 1.07   | -2.78          |
| Jul                        | -4.42   | – | 1.06   | -3.35          |
| Aug                        | -4.80   | – | 0.59   | -4.21          |
| Sep                        | -3.99   | – | 0.12   | -3.87          |
| Oct                        | -2.47   | – | -0.33  | -2.80          |
| Nov                        | -3.15   | – | -1.21  | -4.36          |
| Dec                        | -16.57  | – | -6.61  | -23.19         |
| Tot, Jan–Dec               | -102.34 |   | -26.22 | <u>-128.56</u> |
| $\bar{X}_{\text{Jan–Dec}}$ | -9.30   |   | -2.38  |                |

“–”: no data available.

**Table S9.3.** Monthly albedo-induced radiative forcing ( $\text{RF}_{\Delta\alpha_{\text{mo}}}$ ,  $\text{W m}^{-2}$ ) January–December for Ecoregion 56f. Cumulative  $\text{RF}_{\Delta\alpha_{\text{mo}}}$  value for the entire ecoregion over the 11-month period is underlined. Positive and negative values of  $\text{RF}_{\Delta\alpha_{\text{mo}}}$  indicate monthly warming and cooling effects, respectively.

| Ecoregion | Month        | $\text{RF}_{\Delta\alpha_{\text{mo}}} (\text{W m}^{-2})$ |         |        |                |
|-----------|--------------|----------------------------------------------------------|---------|--------|----------------|
|           |              | Cropland                                                 | Pasture | Urban  | Tot.cover type |
| 56f       | Jan          | -20.17                                                   | -14.16  | -7.30  | -41.63         |
|           | Feb          | -28.77                                                   | -20.85  | -8.72  | -58.34         |
|           | Apr          | -6.79                                                    | -5.21   | -2.01  | -14.01         |
|           | May          | -6.73                                                    | -5.09   | -1.02  | -12.84         |
|           | Jun          | -3.74                                                    | -3.21   | 1.22   | -5.73          |
|           | Jul          | -4.31                                                    | -2.73   | 1.23   | -5.80          |
|           | Aug          | -4.70                                                    | -2.36   | 0.76   | -6.29          |
|           | Sep          | -3.90                                                    | -2.24   | 0.23   | -5.92          |
|           | Oct          | -2.43                                                    | -1.76   | -0.30  | -4.49          |
|           | Nov          | -3.08                                                    | -2.14   | -1.16  | -6.38          |
|           | Dec          | -16.28                                                   | -11.62  | -6.15  | -34.04         |
|           | Tot, Jan–Dec | -100.89                                                  | -71.36  | -23.22 | <u>-195.46</u> |

---

$\bar{X}_{\text{Jan-Dec}}$       -9.17      -6.49      -2.11

---

“–”: no data available.

**Table S9.4.** Monthly albedo-induced radiative forcing ( $\text{RF}_{\Delta\text{amo}}$ ,  $\text{W m}^{-2}$ ) January–December for Ecoregion 56g. Cumulative  $\text{RF}_{\Delta\text{amo}}$  value for the entire ecoregion over the 11-month period is underlined. Positive and negative values of  $\text{RF}_{\Delta\text{amo}}$  indicate monthly warming and cooling effects, respectively.

| Ecoregion | Month                      | $\text{RF}_{\Delta\text{amo}}$ ( $\text{W m}^{-2}$ ) |         |        |                |
|-----------|----------------------------|------------------------------------------------------|---------|--------|----------------|
|           |                            | Cropland                                             | Pasture | Urban  | Tot.cover type |
| 56g       | Jan                        | -20.09                                               | -14.34  | -7.18  | -41.60         |
|           | Feb                        | -28.63                                               | -21.09  | -8.42  | -58.14         |
|           | Apr                        | -6.66                                                | -5.22   | -1.95  | -13.83         |
|           | May                        | -6.55                                                | -5.11   | -0.89  | -12.54         |
|           | Jun                        | -3.61                                                | -3.16   | 1.37   | -5.40          |
|           | Jul                        | -4.20                                                | -2.67   | 1.38   | -5.50          |
|           | Aug                        | -4.62                                                | -2.32   | 0.88   | -6.05          |
|           | Sep                        | -3.84                                                | -2.21   | 0.30   | -5.75          |
|           | Oct                        | -2.39                                                | -1.74   | -0.29  | -4.42          |
|           | Nov                        | -3.05                                                | -2.14   | -1.17  | -6.36          |
|           | Dec                        | -16.18                                               | -11.77  | -6.09  | -34.04         |
|           | Tot.Jan-Dec                | -99.83                                               | -71.74  | -22.06 | <u>-193.64</u> |
|           | $\bar{X}_{\text{Jan-Dec}}$ | -9.08                                                | -6.52   | -2.01  |                |

---

“–”: no data available.

**Table S9.5.** Monthly albedo-induced radiative forcing ( $RF_{\Delta\alpha_{mo}}$ ,  $W\ m^{-2}$ ) January–December for Ecoregion 56h. Cumulative  $RF_{\Delta\alpha_{mo}}$  value for the entire ecoregion over the 11-month period is underlined. Positive and negative values of  $RF_{\Delta\alpha_{mo}}$  indicate monthly warming and cooling effects, respectively.

| Ecoregion | Month               | $RF_{\Delta\alpha_{mo}}\ (W\ m^{-2})$ |         |        |                |
|-----------|---------------------|---------------------------------------|---------|--------|----------------|
|           |                     | Cropland                              | Pasture | Urban  | Tot.cover type |
| 56h       | Jan                 | -20.25                                | –       | -7.33  | -27.58         |
|           | Feb                 | -28.92                                | –       | -8.72  | -37.64         |
|           | Apr                 | -6.76                                 | –       | -2.05  | -8.81          |
|           | May                 | -6.69                                 | –       | -1.04  | -7.73          |
|           | Jun                 | -3.74                                 | –       | 1.20   | -2.54          |
|           | Jul                 | -4.34                                 | –       | 1.20   | -3.14          |
|           | Aug                 | -4.73                                 | –       | 0.73   | -4.01          |
|           | Sep                 | -3.92                                 | –       | 0.19   | -3.73          |
|           | Oct                 | -2.43                                 | –       | -0.33  | -2.76          |
|           | Nov                 | -3.07                                 | –       | -1.19  | -4.26          |
|           | Dec                 | -16.32                                | –       | -6.21  | -22.53         |
|           | Tot.Jan–Dec         | -101.18                               |         | -23.55 | <u>-124.73</u> |
|           | $\bar{X}_{Jan-Dec}$ | -9.20                                 |         | -2.14  |                |

“–”: no data available.

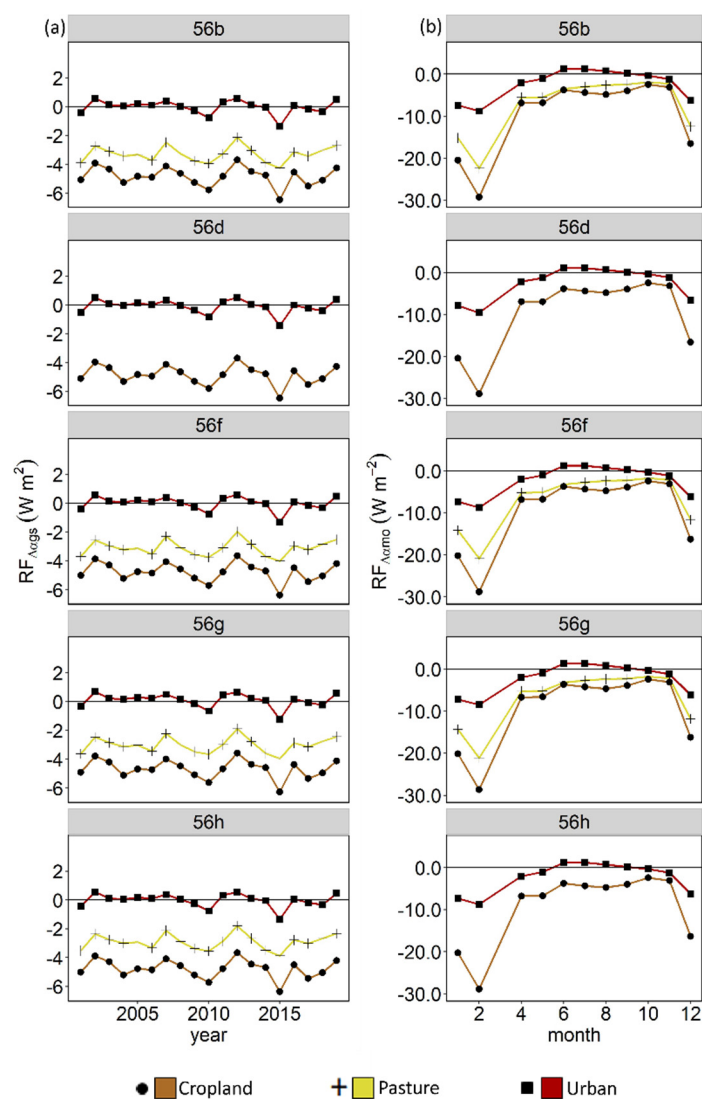

**Figure S1.** Albedo-induced radiative forcing ( $RF_{\Delta\alpha}$ ) for the five Level IV ecoregions. Panels **a,b** represent the  $RF_{\Delta\alpha}$  for the growing season ( $RF_{\Delta\alpha_{gs}}$ ; 2001–2019) and monthly ( $RF_{\Delta\alpha_{mo}}$ ; January–December, less March) periods, respectively. Positive and negative values of  $RF_{\Delta\alpha_{gs}}$  and  $RF_{\Delta\alpha_{mo}}$  indicate warming and cooling effects, respectively, during 19 growing seasons and 11 months over the 19-year period, respectively.
